# Supplementary material for: Anionic starch-based hybrid cryogel-embedded ZnO nanoparticles: tuning the elasticity and pH-functionality of biocomposites with dicarboxylic acid units
Source: Royal Society of Chemistry journal article supplement (doi:10.1039/d4sm00136b), 2024-01-01
Supplement: d4sm00136b1.pdf [file d4sm00136b1.pdf]

Supplementary Material

## Anionic starch-based hybrid cryogels embedded ZnO nanoparticles: tuning the elasticity and pH-functionality of biocomposites with dicarboxylic acid units

Sena CİFTBUDAK<sup>a</sup> and Nermin ORAKDOĞEN<sup>b\*</sup>

<sup>a</sup>Graduate School of Science Engineering and Technology, Department of Chemistry, Istanbul Technical University, 34469, Maslak, Istanbul, Turkey

<sup>b</sup>Istanbul Technical University, Department of Chemistry, Soft Materials Research Laboratory, 34469, Maslak, Istanbul, Turkey.

\*Correspondence to: Prof. Nermin Orakdogen (e-mail: [orakdogen@itu.edu.tr](mailto:orakdogen@itu.edu.tr)), Phone: 0090-212-2853305.

### Structural characterization of semi-IPN biocomposites

**Table S1.** Characteristic functional group assignments of raw starch (ST).

| Peak Appearance Wavelength                              |                        |
|---------------------------------------------------------|------------------------|
| Characteristic Functional Group Assignments             | ST (cm <sup>-1</sup> ) |
| C-O bending associated with the OH group                | 1646                   |
| C-H symmetrical scissoring of CH <sub>2</sub> OH moiety | 1421                   |
| C - O - C asymmetric stretching                         | 1154                   |
| C - O - C ring vibration of carbohydrate                | 925, 852               |
| C - O stretching                                        | 1086                   |
| CH <sub>2</sub> symmetric deformation and scissoring    | 1414-1451              |
| C -H symmetric bending                                  | 1363                   |

### Network characteristics of semi-IPN biocomposites

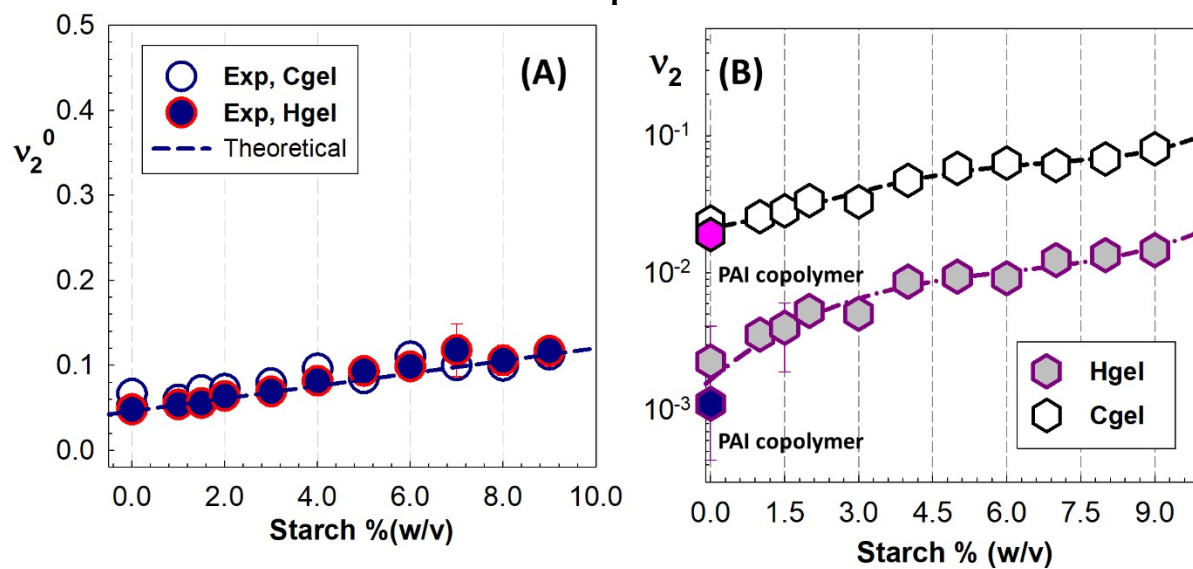

**Figure S1.** Network characteristics of semi-IPN biocomposites. (A) Experimental and theoretical  $\nu_2^0$  values, (B) volume fraction of crosslinked polymer in the swollen network of ST-PAI/ZnO gels shown as a function of ST concentration.

### Elasticity of starch blended ZnO-embedded biocomposites

Figure S2 shows the stress-strain curves of ST-PAI/ZnO Hgels from the uniaxial compression tests after preparation-state (A), after swollen-state (B) and stress-strain curves of ST-PAI/ZnO Cgels after swelling (C). Snapshots during finger compression of ST1-PAI/ZnO Hgel sample containing 1.0% (w/v) of starch in the feed (D).

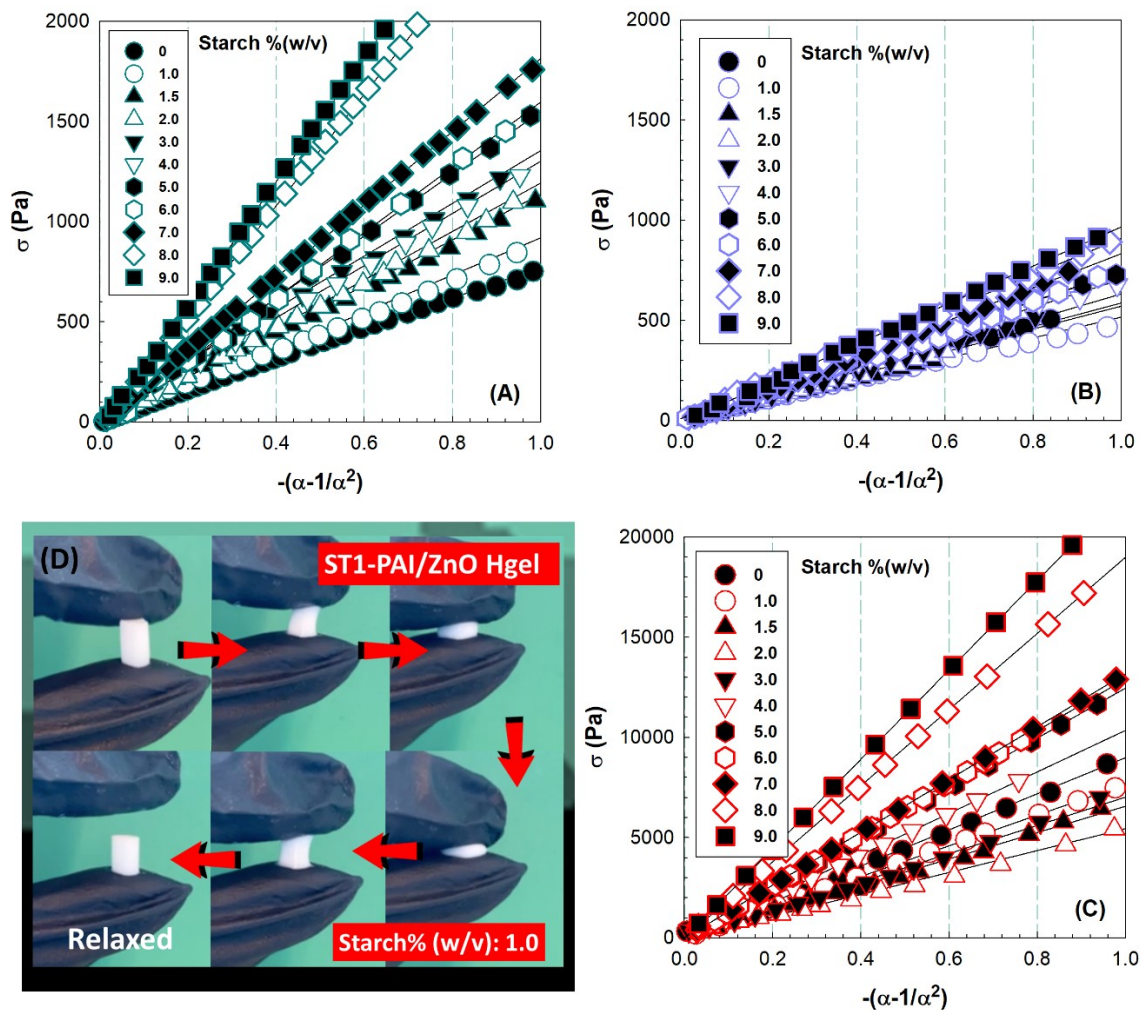

**Figure S2.** Stress-strain curves of ST-PAI/ZnO Hgels from the uniaxial compression tests after preparation-state (A), after swollen-state (B) and stress-strain curves of ST-PAI/ZnO Cgels after swelling (C). Snapshots during finger compression of ST1-PAI/ZnO Hgel sample containing 1.0% (w/v) of starch in the feed (D).

Figure S3 compares the optical appearances of ST-PAI/ZnO hydrogel and cryogel samples containing 1.5% and 7%(w/v) starch in the feed during uniaxial compression.

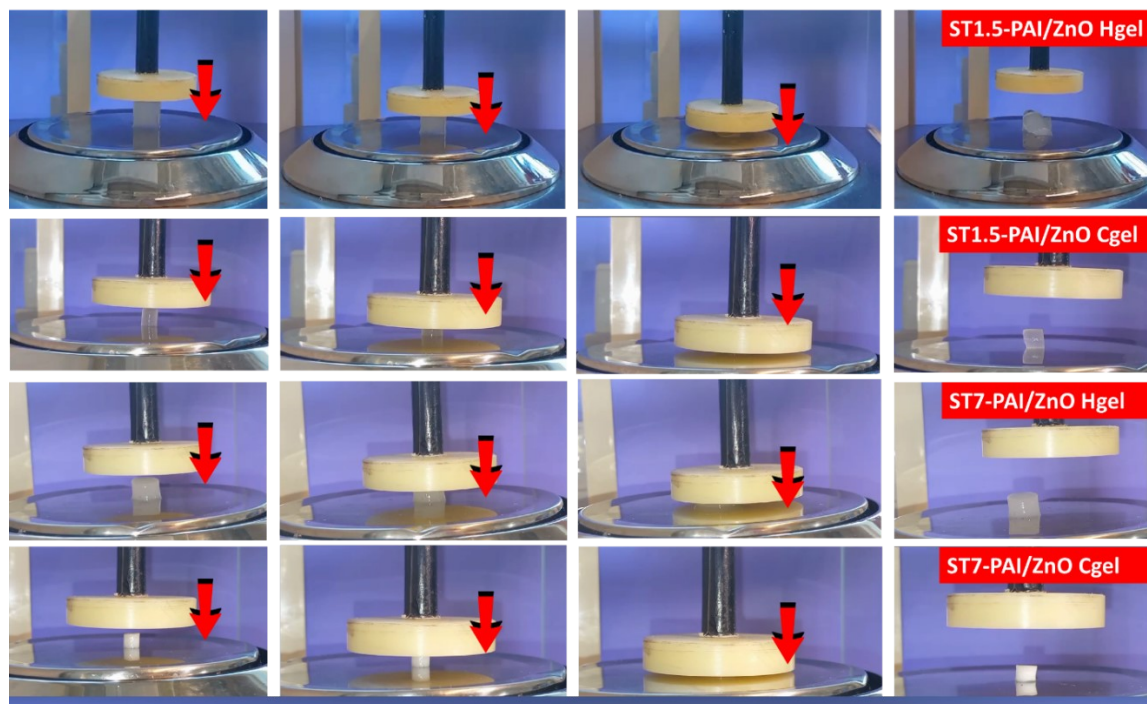

**Figure S3.** Optical appearances of ST-PAI/ZnO hydrogel and cryogel samples containing 1.5% and 7%(w/v) starch in the feed during uniaxial compression.

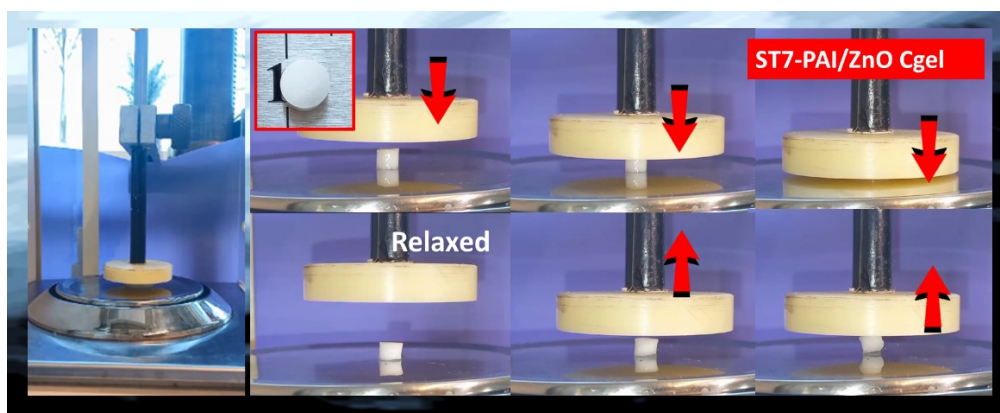

**Figure S4.** Optical appearances of ST7-PAI/ZnO Cgel sample containing 7%(w/v) in the feed during uniaxial compression.

### **pH-induced swelling of starch blended ZnO-embedded biocomposites**

Figure S5 shows pH-sensitive swelling results in order of increasing pH as well as starch content in the feed for ST-PAI/ZnO Hgels. Figure S3 presents the variation of  $\ln \varphi(t) / \varphi_w$  versus  $\ln t$ , and the water fraction  $\varphi(t) / \varphi_w$  versus  $t^{1/2}$  curves of semi-IPN ST-PAI/ZnO Hgels with different starch content in pH 11.2 solution.

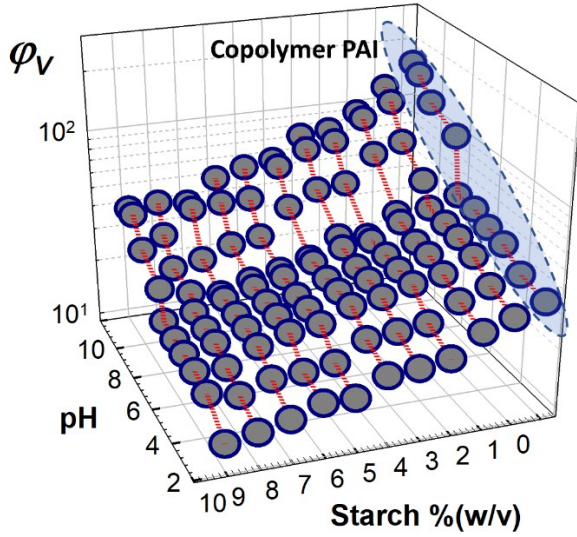

**Figure S5.** pH-sensitive swelling results in order of increasing pH as well as starch content in the feed for ST-PAI/ZnO Hgels.

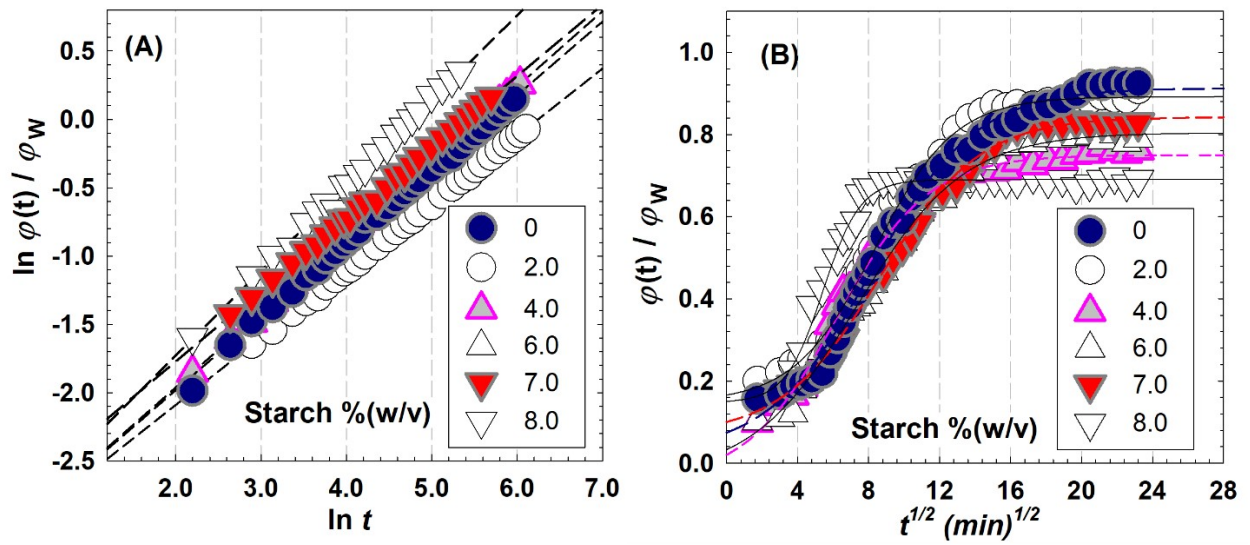

**Figure S6.** (A) Variation of  $\ln \varphi(t) / \varphi_w$  versus  $\ln t$ , and (B) water fraction  $\varphi(t) / \varphi_w$  versus  $t^{1/2}$  curves of semi-IPN ST-PAI/ZnO Hgels with different starch content in pH 11.2 solution.



## Salt-induced swelling of starch blended ZnO-embedded biocomposites

Figure S7 shows the swelling of ST-PAI/ZnO Cgels with various starch content in the presence of different salts: NaBr, NaCl, NaNO<sub>3</sub> and Na<sub>2</sub>SO<sub>4</sub>.

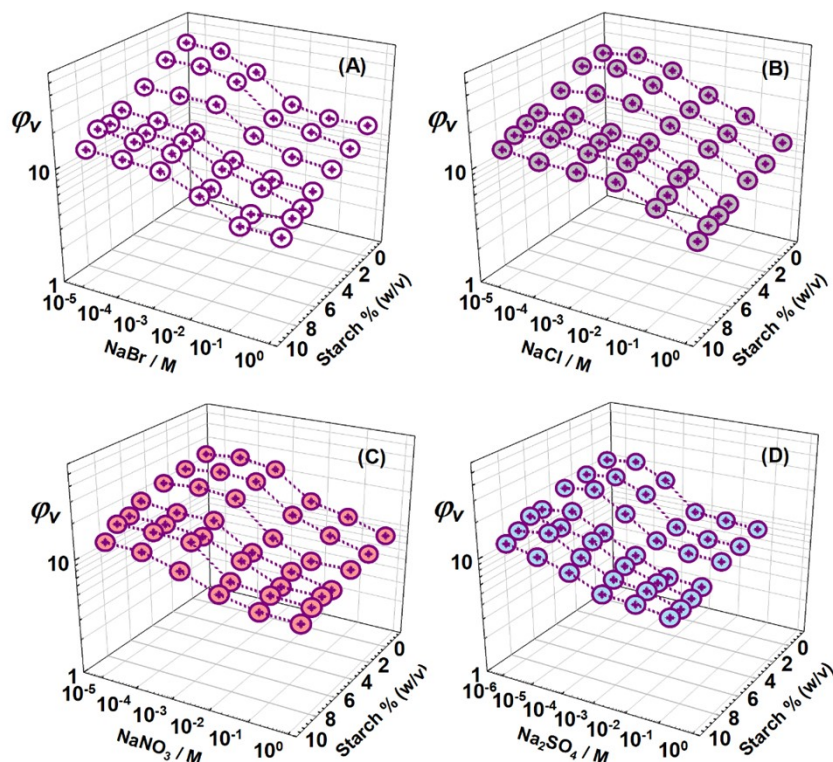

**Figure S7.** Swelling of ST-PAI/ZnO Cgels with various starch content in the presence of different salts: NaBr (A), NaCl (B), NaNO<sub>3</sub> (C) and Na<sub>2</sub>SO<sub>4</sub> (D).

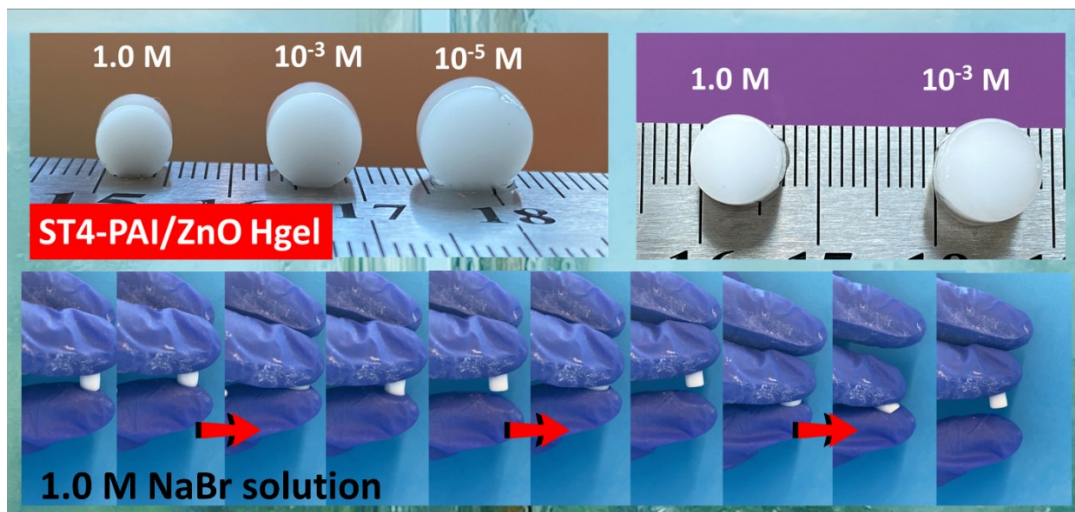

**Figure S8.** Optical appearances of ST4-PAI/ZnO Hgel sample containing 4.0 % (w/v) starch after swelling in NaBr solutions of different ionic strength. Mechanical stability of the sample after swelling in 1.0 M of NaBr solution.

### Adsorption capacity of semi-IPN biocomposites for MV dye

**Table S2.** Kinetic parameters describing the adsorption of MV onto semi-IPN ST-PAI/ZnO Hgels prepared at different starch content based on pseudo-first-order, pseudo-second-order, Elovich, and intraparticle diffusion models.

| Pseudo-first order model  |                                              |                | Elovich model                                              |                   |                                                          |                |
|---------------------------|----------------------------------------------|----------------|------------------------------------------------------------|-------------------|----------------------------------------------------------|----------------|
| Starch %(w/v)             | $k_1 \times 10^{-2}$<br>(min <sup>-1</sup> ) | R <sup>2</sup> | $\alpha$<br>(mg/g min)                                     | $\beta$<br>(g/mg) | R <sup>2</sup>                                           |                |
| 0                         | 1.8143                                       | 0.9322         | 7.3985                                                     | 0.3330            | 0.9825                                                   |                |
| 8.0                       | 3.5223                                       | 0.8568         | 2.4000                                                     | 0.6680            | 0.9116                                                   |                |
| 9.0                       | 4.265128                                     | 0.8704         | 1.7388                                                     | 0.7236            | 0.9308                                                   |                |
| Pseudo-second order model |                                              |                | Intraparticle diffusion model                              |                   |                                                          |                |
| Starch %(w/v)             | $k_2 \times 10^{-2}$<br>(min <sup>-1</sup> ) | R <sup>2</sup> | $k_{initial}$<br>(mg g <sup>-1</sup> min <sup>-1/2</sup> ) | R <sup>2</sup>    | $k_{later}$<br>(mg g <sup>-1</sup> min <sup>-1/2</sup> ) | R <sup>2</sup> |
| 0                         | 0.6042                                       | 0.9948         | 3.2861                                                     | 0.9926            | 0.7518                                                   | 0.9857         |
| 8.0                       | 1.7327                                       | 0.9970         | 2.1930                                                     | 0.9669            | 0.4728                                                   | 0.7075         |
| 9.0                       | 1.4957                                       | 0.9967         | 1.8384                                                     | 0.9687            | 0.2020                                                   | 0.8780         |

**Table S3.** Thermodynamic parameters for adsorption of MV dye and adsorption capacity of semi-IPN ST-PAI/ZnO Cgels and Hgels prepared at different starch content calculated from various kinetic models.

| Starch %(w/v) | ST-PAI/ZnO Cgels     |                                       |                                        |                           | ST-PAI/ZnO Hgels     |                                       |                                        |                           |
|---------------|----------------------|---------------------------------------|----------------------------------------|---------------------------|----------------------|---------------------------------------|----------------------------------------|---------------------------|
|               | Exp. $q_e$<br>(mg/g) | Pseudo-first order $q_{e1}$<br>(mg/g) | Pseudo-second order $q_{e2}$<br>(mg/g) | $\Delta G^o$<br>(J/mol K) | Exp. $q_e$<br>(mg/g) | Pseudo-first order $q_{e1}$<br>(mg/g) | Pseudo-second order $q_{e2}$<br>(mg/g) | $\Delta G^o$<br>(J/mol K) |
| 0             | 12.230               | 8.715                                 | 12.727                                 | -2533.7                   | 18.556               | 11.455                                | 17.963                                 | -5192.9                   |
| 8.0           | 5.719                | 4.009                                 | 6.092                                  | -1307.4                   | 7.552                | 5.054                                 | 7.747                                  | -1108.1                   |
| 9.0           | 8.397                | 5.264                                 | 8.763                                  | -1835.8                   | 6.635                | 5.264                                 | 7.015                                  | -975.3                    |
